# Supplementary material for: Sicilian Rivet Wheat Landraces: Grain Characteristics and Technological Quality of Flour and Bread
Source: MDPI journal article supplement (doi:10.3390/plants12142641), 2023-07-14
Supplement: s1 [file s1]

**Table S1 - K-means Cluster Analysis. Cluster membership.**  
**Cluster Membership**

| Case Number | SAMPLE                 | Cluster | Distance |
|-------------|------------------------|---------|----------|
| 1           | Bidì 03                | 1       | 3.518    |
| 12          | Bufala Rossa Corta b01 | 1       | 3.518    |
| 2           | Simeto                 | 2       | 0.000    |
| 7           | Bufala Nera Corta 01   | 3       | 4.463    |
| 13          | Bufala Rossa Lunga 01  | 3       | 3.871    |
| 18          | Ciciredda 02           | 3       | 3.203    |
| 9           | Bufala Nera Lunga 01   | 4       | 3.171    |
| 10          | Bufala Nera Lunga 02   | 4       | 2.792    |
| 14          | Bufala Rossa Lunga 03  | 4       | 4.129    |
| 3           | Bivona 03              | 5       | 4.212    |
| 4           | Bivona 04              | 5       | 4.399    |
| 5           | Bufala Bianca 02       | 5       | 4.098    |
| 6           | Bufala Bianca 03       | 5       | 5.475    |
| 8           | Bufala Nera Corta 02   | 5       | 4.973    |
| 11          | Bufala Nera Lunga 04   | 5       | 5.013    |
| 15          | Bufale Cerami 01       | 5       | 4.488    |
| 16          | Bufale Salice 01       | 5       | 5.029    |
| 17          | Bufale Troina 01       | 5       | 4.081    |
| 19          | Ciciredda 03           | 5       | 3.616    |
| 20          | Paola 02               | 5       | 3.342    |

**Table S2** - K-means Cluster Analysis. ANOVA results.

|                                                     | Cluster     |    | Error       |    | F      | Sig. |
|-----------------------------------------------------|-------------|----|-------------|----|--------|------|
|                                                     | Mean Square | df | Mean Square | df |        |      |
| Zscore: P/L                                         | 4.351       | 4  | .106        | 15 | 40.854 | .000 |
| Zscore: W (10 <sup>-4</sup> x J)                    | 4.313       | 4  | .117        | 15 | 36.985 | .000 |
| Zscore: Semolina_b*                                 | 4.275       | 4  | .127        | 15 | 33.748 | .000 |
| Zscore: H <sub>2</sub> O absorpion in 500 B.U.) (%) | 4.086       | 4  | .177        | 15 | 23.061 | .000 |
| Zscore: Dough stability (min)                       | 3.917       | 4  | .222        | 15 | 17.644 | .000 |
| Zscore: Dry gluten                                  | 3.762       | 4  | .264        | 15 | 14.276 | .000 |
| Zscore: Development time (min)                      | 3.710       | 4  | .277        | 15 | 13.385 | .000 |
| Zscore: Bread_weight (g)                            | 3.457       | 4  | .345        | 15 | 10.028 | .000 |
| Zscore: Starchy kernels (%)                         | 3.442       | 4  | .349        | 15 | 9.870  | .000 |
| Zscore: Bread_Volume (cm <sup>3</sup> )             | 3.385       | 4  | .364        | 15 | 9.297  | .001 |
| Zscore: Peak Dough Height (M.U.)                    | 3.183       | 4  | .418        | 15 | 7.621  | .001 |
| Zscore: Degree of softening                         | 3.178       | 4  | .419        | 15 | 7.580  | .002 |
| Zscore: Semolina_L*                                 | 3.067       | 4  | .449        | 15 | 6.832  | .002 |
| Zscore: SDS sedimentation height (mm)               | 3.001       | 4  | .466        | 15 | 6.436  | .003 |
| Zscore: Wet gluten                                  | 2.982       | 4  | .471        | 15 | 6.326  | .003 |
| Zscore: Ash (g/100g d.m.)                           | 2.707       | 4  | .545        | 15 | 4.968  | .009 |
| Zscore: Protein (g/100g d.m.)                       | 2.706       | 4  | .545        | 15 | 4.965  | .009 |
| Zscore: Crumb_yellow index (b*)                     | 2.607       | 4  | .572        | 15 | 4.560  | .013 |
| Zscore: Hectoliter weight (kg/hL)                   | 2.535       | 4  | .591        | 15 | 4.291  | .016 |
| Zscore: Bread_height (mm)                           | 2.504       | 4  | .599        | 15 | 4.180  | .018 |
| Zscore: Water Binding in wet Gluten (%)             | 2.401       | 4  | .626        | 15 | 3.833  | .024 |
| Zscore: Semolina_a*                                 | 2.360       | 4  | .637        | 15 | 3.704  | .027 |
| Zscore: Thousand kernel weight (g)                  | 2.223       | 4  | .674        | 15 | 3.300  | .040 |
| Zscore: Gluten Index                                | 2.069       | 4  | .715        | 15 | 2.895  | .058 |
| Zscore: Shrunken kernels (%)                        | 2.024       | 4  | .727        | 15 | 2.784  | .065 |

|                                 |       |   |       |    |       |      |
|---------------------------------|-------|---|-------|----|-------|------|
| Zscore: Mixing Time (s)         | 1.890 | 4 | .763  | 15 | 2.477 | .089 |
| Zscore: Crust_red index (a*)    | 1.679 | 4 | .819  | 15 | 2.051 | .139 |
| Zscore: Bread_moisture (%)      | 1.617 | 4 | .836  | 15 | 1.935 | .157 |
| Zscore: Crust_yellow index (b*) | 1.570 | 4 | .848  | 15 | 1.851 | .172 |
| Zscore: Moisture (g/100 g)      | 1.270 | 4 | .928  | 15 | 1.368 | .292 |
| Zscore: Crust_L*                | 1.064 | 4 | .983  | 15 | 1.082 | .400 |
| Zscore: Bread_Porosity (1-8)    | 1.006 | 4 | .999  | 15 | 1.007 | .435 |
| Zscore: Falling number (s)      | .875  | 4 | 1.033 | 15 | .846  | .517 |
| Zscore: Crumb_red index (a*)    | .284  | 4 | 1.191 | 15 | .238  | .912 |
| Zscore: Black point (%)         | .184  | 4 | 1.218 | 15 | .151  | .960 |
| Zscore: Crumb_L*                | .107  | 4 | 1.238 | 15 | .086  | .985 |

The F tests should be used only for descriptive purposes because the clusters have been chosen to maximize the differences among cases in different clusters. The observed significance levels are not corrected for this and thus cannot be interpreted as tests of the hypothesis that the cluster means are equal.
